# Supplementary material for: The Arabidopsis thaliana Mediator subunit MED8 regulates plant immunity to Botrytis Cinerea through interacting with the basic helix-loop-helix (bHLH) transcription factor FAMA
Source: PubMed Central journal article supplement (PMC5841781; doi:10.1371/journal.pone.0193458), 2018-03-07
Supplement: pone.0193458.s005.pdf [file pone.0193458.s005.pdf]

**Supplemental Table 1. The primers used in this study.**

| <b>Primers for Y2H</b>     |                                                    |
|----------------------------|----------------------------------------------------|
| <b>MED8-BD</b>             | <b>F:</b> GGAATTCATATGATGGAGACACAGCCGCAGCAACC      |
|                            | <b>R:</b> CCGGAATTCTTATTGAGGATTTTGGTGCCTTTG        |
| <b>MED25-BD</b>            | <b>F:</b> CGGAATTCATGTCGTCGGAGGTGAAACAG            |
|                            | <b>R:</b> TTGGATCCTTATCCCATGAAGCCAGCTCC            |
| <b>FAMA-AD</b>             | <b>F:</b> GGAATTCATATGATGGATAAAGATTACTCGGCAC       |
|                            | <b>R:</b> CGCGGATCCTCAAGTAAACACAATATTTCCC          |
| <b>MYC2-AD</b>             | <b>F:</b> GGAATTCATATGACTGATTACCGGCTACAACCAACGATGA |
|                            | <b>R:</b> CCATCGATCACCGATTTTGAATCAAACCTTGC         |
| <b>Primers for qRT-PCR</b> |                                                    |
| <b>ERF1-RT</b>             | <b>F:</b> GGAAATTCGCGGCGGAGATAAGA                  |
|                            | <b>R:</b> CAACGCCACAACCGGAGAACAAC                  |
| <b>PDF1.2-RT</b>           | <b>F:</b> CGCACCGGCAATGGTGGAAAG                    |
|                            | <b>R:</b> CACACGATTTAGCACCAAAG                     |
| <b>ORA59-RT</b>            | <b>F:</b> AAGGGATAAGAGTGTGGCTTGG                   |
|                            | <b>R:</b> CCGGAGAGATTCTTCAACGACA                   |
| <b>PR1-RT</b>              | <b>F:</b> TCGTCTTTGTAGCTCTTGTAGGTG                 |
|                            | <b>R:</b> TAGATTCTCGTAATCTCAGCTCT                  |
| <b>BcActin-RT</b>          | <b>F:</b> CGTCACTACCTTCAACTCCATC                   |
|                            | <b>R:</b> CGGAGATACCTGGGTACATAGT                   |
| <b>ACT7-RT</b>             | <b>F:</b> CCATTCAGGCCGTTCTTTC                      |

|                                                   |                                             |
|---------------------------------------------------|---------------------------------------------|
|                                                   | <b>R:</b> CGTTCTGCGGTAGTGGTGA               |
| <b>ORA59-a-CHIP</b>                               | <b>F:</b> CATCTATTTTGTCTGGGAATAC            |
|                                                   | <b>R:</b> GGTGCTACAATAATAATATTC             |
| <b>ORA59-b-CHIP</b>                               | <b>F:</b> CGTCTCTCTTTCGCTACAGGTT            |
|                                                   | <b>R:</b> GGATGAGCCTATTAGTGGTGGACC          |
| <b>Primers for transgene vectors construction</b> |                                             |
| <b>FAMA</b>                                       | <b>F:</b> ATGGATAAAGATTACTCGGCAC            |
|                                                   | <b>R:</b> TCAAGTAAACACAATATTTCCC            |
| <b>MED8</b>                                       | <b>F:</b> ATGGAGACACAGCCGCAGCAACC           |
|                                                   | <b>R:</b> TTATTGAGGATTTTGGTGCCTTTG          |
| <b>FAMA-CDS-1300</b>                              | <b>F:</b> CGCGGATCCATGGATAAAGATTACTCGGCAC   |
|                                                   | <b>R:</b> CGGGGTACCAGTAAACACAATATTTCCCAGGT  |
| <b>FAMA-Promotor-1300</b>                         | <b>F:</b> TGCACTGCAGTATATCAATCAGTCTCTTCGCT  |
|                                                   | <b>R:</b> GCGTCGACTGCTATTCGTGGTAGTTGATTATAA |
| <b>MED8-CDS-1300</b>                              | <b>F:</b> CGCGGATCCATGGAGACACAGCCGCAGCAACC  |
|                                                   | <b>R:</b> CGGGGTACCTTGAGGATTTTGGTGCCTTTG    |
| <b>MED8-Promotor-1300</b>                         | <b>F:</b> TGCACTGCAGAGAACTCTCTTCTTCCC       |
|                                                   | <b>R:</b> GCGTCGACTGATAACACAGAGCTAATACAC    |
| <b>Primers for LUC experiments</b>                |                                             |
| <b>FAMA-cLUC</b>                                  | <b>F:</b> CGGGGTACCATGGATAAAGATTACTCGGCAC   |
|                                                   | <b>R:</b> AACTGCAGTCAAGTAAACACAATATTTCCC    |
| <b>MED8-nLUC</b>                                  | <b>F:</b> CGGGGTACCATGGAGACACAGCCGCAGCAACC  |

|                                |                                             |
|--------------------------------|---------------------------------------------|
|                                | <b>R:</b> ACGCGTCGACTTATTGAGGATTTGGTGCCTTTG |
| <b>ORA59<sub>Pro</sub>-LUC</b> | <b>F:</b> CCCAAGCTTAATTTGGTTAGGCTAGGGACG    |
|                                | <b>R:</b> TAACTGCAGTTTCGATCTTTTTTTTTTCTTC   |
